# Supplementary material for: Nanostructured CeO2 ultrathin film deposited by the Langmuir Blodgett technique for highly sensitive and specific detection of sub ppm level NO2 gas at room temperature
Source: Royal Society of Chemistry journal article supplement (doi:10.1039/d3tc01561k), 2023-01-01
Supplement: d3tc01561k1.pdf [file d3tc01561k1.pdf]

### Supplementary

#### **Nanostructured CeO<sub>2</sub> ultrathin film deposited by Langmuir Blodgett technique for Highly Sensitive and Specific Detection of sub ppm level NO<sub>2</sub> gas at room temperature**

Sipra Choudhury,<sup>\*a,c</sup> Supriya Kanth,<sup>a,c</sup> Vibha Saxena,<sup>b,c</sup> Jagannath,<sup>b</sup> C. A. Betty<sup>a,c</sup>

<sup>a</sup>Chemistry Division, Bhabha Atomic Research Centre,

<sup>b</sup>Technical Physics Division

<sup>c</sup>Homi Bhabha National Institute

Mumbai-400085, India

E-mail: sipra@barc.gov.in; Fax: +91 22 25505151; Tel: +91 22 25590284

Table S1: Comparison with response and recovery time between our sensor and other CeO<sub>2</sub> sensors reported

| Sample                                                         | Operating temperature | Response with NO <sub>2</sub> | Response time | Recovery time         | Ref      |
|----------------------------------------------------------------|-----------------------|-------------------------------|---------------|-----------------------|----------|
| Columnar CeO <sub>2</sub> nanostructures                       | 200° C                | $\Delta R/R = 38$ for 1 ppm   | not reported  | not reported          | [7]      |
| Spin coated cerium oxide films                                 | 200° C                | 6% at 5 ppm                   | 5 sec         | 35 sec                | [8]      |
| Nanocubic CeO <sub>2</sub> with {100} Polar Facets on Graphene | Room temperature      | 16.59 % for 5 ppm             | 189 sec       | 1137 sec              | [12]     |
| RGO-CeO <sub>2</sub> hybrids                                   | Room temperature      | $\Delta I/I = 4.5$ for 10 ppm | 600 sec       | 258 sec with UV light | [13]     |
| CeO <sub>2</sub> by LB technique                               | Room temperature      | 200% for 1 ppm                | 60 sec        | 600 sec               | Our work |

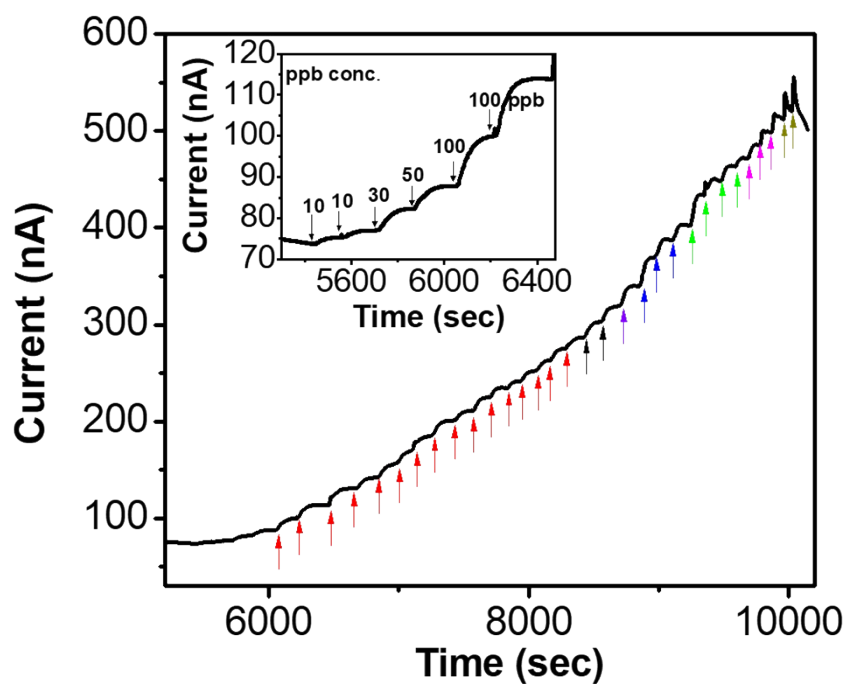

Fig. S1. Response of CeO<sub>2</sub> sensor with various concentration of NO<sub>2</sub> gas with stepwise injection represented by colored arrow: Red = 100 ppb, black = 200 ppb, blue = 400 ppb, green = 500 ppb, purple = 1 ppm, gray = 2ppm.

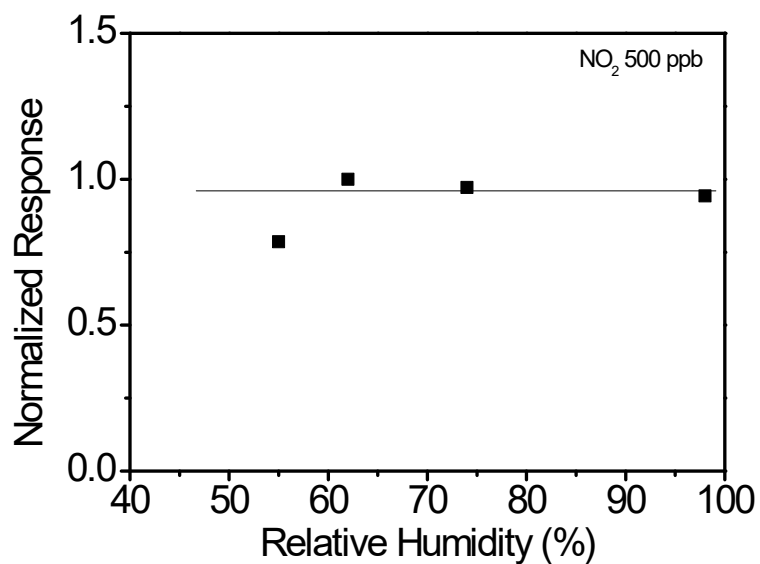

Fig. S2. Normalized response with various humidity condition

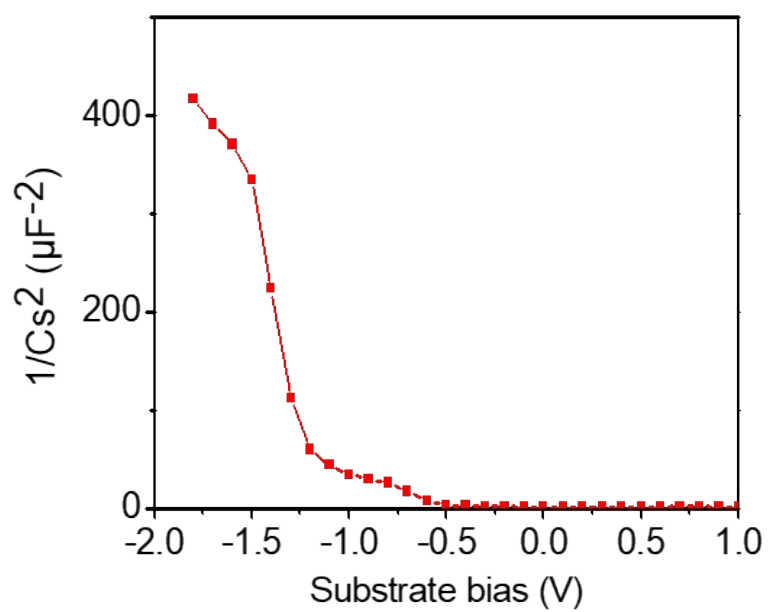

**Fig. S3. Mott-Schottky plot of ultrathin CeO<sub>2</sub> on Si using 0.1 M KCl electrolyte at frequency of 1 kHz**
